1 **Biological Potencial of *Colletotrichum typhae* H.C Greene mycoherbicide for *Typha domingensis***

2 **Pers**

3 **Cláudio Belmino Maia<sup>1</sup>, Paulo Alexandre Fernandes Rodrigues de Melo<sup>1</sup>, Robert Weingart**  
4 **Barreto<sup>2</sup>, Luiz Antônio Maffia<sup>2</sup>, Kedma Maria Silva Pinto<sup>3</sup>, Antonia Alice Costa Rodrigues<sup>1</sup>, Ilka**  
5 **Márcia Ribeiro de Souza Serra<sup>1</sup>, Mário Luiz Ribeiro Mesquita<sup>4</sup>, Janaina Marques Mondego<sup>1</sup>,**  
6 **Aline Priscilla Gomes da Silva<sup>5</sup>**

7  
8 <sup>1</sup>Universidade Estadual do Maranhão, Centro de Ciências Agrárias, Programa de Pós-Graduação em  
9 Agroecologia, CP 65.055-098, São Luís, MA, Brazil. E-mail: claudiomaia@professor.uema.br;  
10 pauloalexandrefernandes@outlook.com; janainamondego@yahoo.com.br; aacrodrigues@outlook.com;  
11 ilka.tt@gmail.com;

12 <sup>2</sup>Universidade Federal de Viçosa, Centro de Ciências Agrárias, Departamento de Fitopatologia. Email:  
13 rbarreto@ufv.br; lamaffia@ufv.br

14 <sup>3</sup>Universidade Federal Rural de Pernambuco, Programa de Pós-Graduação em Produção Agrícola. E-  
15 mail: kedma\_maria@hotmail.com

16 <sup>4</sup>Universidade Estadual do Maranhão, Programa de Pós-Graduação em Agricultura e Ambiente. E-  
17 mail: mario-mesquita51@hotmail.com

18 <sup>5</sup>Michigan State University, Department of Horticulture, East Lansing, MI 48824, United States. E-  
19 mail: alinepgsilva@gmail.com

20  
21 **Corresponding author: pauloalexandrefernandes@outlook.com**

22

23 **Abstract**

24 The anthropic interference in aquatic ecosystems, favors the disordered colonization of *T. domingensis*,  
25 damaging the production of hydroelectric power and river traffic. Thus, the objective of this study was  
26 to evaluate the potential of *C. typhae* as a mycoherbicide in the control of *T. domingensis*, in vitro and  
27 in greenhouse. 107 samples of symptomatic *T. domingensis* leaves were collected in flooded areas of  
28 rivers in Brazil, with identification and isolation of the collected fungal species. The concentration of  
29 inoculum was determined to evaluate the incidence and severity of the disease, the influence of  
30 temperature on mycelial growth and conidia germination, the effect of temperature and leaf wetness  
31 period on *T. domingensis* infection by *C. typhae* and the host range test. The growth of the colonies of  
32 *C. typhae* was higher at 25 to 30 °C, there was no interference of the photoperiod on germination of the  
33 spores, but the highest percentage of germination occurred at 17.39 °C. The influence of environmental

34 conditions on infection of inoculated leaves of *T. domingensis* indicated that at 15 °C and the period of  
35 leaf wetness of 48 hours promoted the highest incidence of the disease, as well as the severity for the  
36 same period of leaf wetness. The specificity test showed that *C. typhae* is specific and pathogenic to *T.*  
37 *domingensis*. Being this the first report of the occurrence of this pathogen in aquatic macrophytes of  
38 this species and in *T. domingensis* in Brazil.

39 **Keywords:** Biological control; Aquatic macrophytes, Leaf wetness

40

## 41 **Introduction**

42 *Typha domingensis* Pers. is an invasive macrophyte found in the Americas, Europe, Africa, Asia and  
43 Oceania, being considered as a native species of South America, occurring throughout Brazil [1]. It is  
44 propagated either by seeds or vegetatively, by rhizomes, with vigorous growth by the decomposition  
45 and assimilation of organic matter as a source of nutrients, reaching about seven tons of rhizomes per  
46 hectare [2]. Thus, *T. domingensis* is used as a biological filter for urban sewage, industrial effluents rich  
47 in heavy metals and erosion control in drainage channels and reservoir banks [3].

48 However, anthropic interference in aquatic ecosystems favors the colonization of *T. domingensis*,  
49 which may hinder the production of hydroelectric power, river traffic and agricultural irrigation [4]. In  
50 the United States, this macrophyte accounts for the degradation of almost 12.000 ha<sup>-1</sup> of Florida  
51 marshes, due its aggressive growth in response to eutrophication by nitrates and phosphates from  
52 agricultural and urban waste and frequent fires [5]. In Brazil, it is estimated that the intense growth of  
53 *T. domingensis* in reservoirs of the country's hydroelectric dams extends to about 300 ha<sup>-1</sup> in the water  
54 mirror. These changes contribute to the reduction of water quality and biodiversity patterns in  
55 environments colonized by this species [6].

56 Up to a certain limit, the development of aquatic vegetation can be considered harmful in several  
57 ecosystems [7]. In order to reduce the environmental, social and economic impacts caused by

58 hydrophytic plants, mechanical and biological control have been used [8,9]. The use of chemical  
59 herbicides is another option to control aquatic weed macrophytes, being allowed in countries like the  
60 United States, although its application is controversial in European countries and in Brazil [10]. This is  
61 due to the low acceptance by society, due to the excessive use of toxic agrochemicals to different plant  
62 species, besides the low number of registered products [11].

63 Thus, the use of weed control methods with a higher degree of specificity that reach only the target  
64 species constitutes viable alternatives [12]. Among these, the mass production of microorganisms,  
65 intended for the formulation of mycoherbicides, has been shown to be effective in weed management in  
66 several parts of the world [13]. Research results have shown the efficacy of several commercial  
67 mycoherbicides made with fungi of the genus *Colletotrichum*, with control rates reaching 90%, such as  
68 the use of *Colletotrichum truncatum* (Schwein) in *Sesbania exaltata* (Raf.) Rydb. ex AW Hill.,  
69 *Colletotrichum acutatum* (Sim.) in *Hakea sericea* Schrad. and *Colletotrichum gloeosporioides* Penz.  
70 (Sacc.) in the control of *Aeschynomene virginica* L. [11].

71 Research on microorganisms in the prospection of mycoherbicides aims to establish optimal culture  
72 conditions for mass and durable production of the inoculum in artificial culture [14]. The pathogen  
73 should be genetically stable and specific in order to generate rapid and high disease level, with  
74 consequent death or suppression of the target plant, and should not present pathogenicity to crops of  
75 agricultural interest [15]. Thus, it is necessary to study the pathogen and its interaction with the host, as  
76 well as the conditions that predispose the plant to the pathogen, since climate variables such as  
77 temperature may influence both infection and colonization of the pathogen [16]. In addition, host  
78 specificity and preference has been a criterion used in research with *Colletotrichum* species for the  
79 biological control of plants. Some species of these pathogens are capable of infecting single hosts and,  
80 conversely, there are also *Colletotrichum* species capable of infecting multiple host species [17].

81 In recent years, little has been studied about these parasitic relationships between fungi and aquatic  
82 weed macrophytes, however, satisfactory results were obtained in studies with the *Eichhornia crassipes*  
83 Mart. Solms and *Cercospora rodmani* [11]. Another important result was reported by Pitelli et al. [8],  
84 showing that fungi of the genus *Colletotrichum* have been receiving attention as potential  
85 mycoherbicides, suggesting that these pathogens have specific enzymes that promote infection and  
86 degradation of the plant cell wall. Thus, the objective of this study was to evaluate the potential of *C.*  
87 *typhae* as a mycoherbicide in the control of *T. domingensis*, in vitro and in greenhouse.

88

## 89 **Materials and Methods**

### 90 **Obtainment and identification of *T. dominguensis* pathogenic isolates**

91 A total of 107 leaf samples from symptomatic *T. domingensis* plants with necrotic spots were  
92 collected from flooded areas of the São Francisco and Doce rivers, Brazil, from municipalities of the  
93 states of Sergipe (SE), Espírito Santo (ES), Minas Gerais (MG) and Bahia (BA) (Table 1). The  
94 collected material was packed in polyethylene bags and taken to the Plant Diseases Laboratory,  
95 Department of Plant Pathology, Federal University of Viçosa, Viçosa, state of Minas Gerais, Brazil.

96

97 **Table 1. Description of the places of origin where symptomatically *T. domingensis* leaf samples**  
98 **were collected, geographical coordinates, climate, temperature and rainfall (Source: Climate-**  
99 **data. Org, 2015). Viçosa, MG, Brazil, 2018.**

| Place of origin   | Latitude<br>(S) | Longitude<br>(W) | *Climate | Temperature<br>(°C) | Rainfall<br>(mm) |
|-------------------|-----------------|------------------|----------|---------------------|------------------|
| Pacatuba (SE)     | 10° 27' 12"     | 36° 39' 05"      | As       | 25.5                | 1,223            |
| Brejo Grande (SE) | 10° 25' 28"     | 36° 27' 44"      | As       | 25.3                | 1,283            |
| Propriá (SE)      | 10° 12' 40"     | 36° 50' 25"      | Aw       | 25.9                | 821              |

|                              |             |             |     |      |       |
|------------------------------|-------------|-------------|-----|------|-------|
| Regência (ES)                | 19° 23' 27" | 40° 04' 19" | Aw  | 24.3 | 1,213 |
| Vila do Riacho (ES)          | 19° 49' 12" | 40° 16' 22" | Aw  | 24.5 | 1,178 |
| Barra do Riacho (ES)         | 19° 49' 24" | 40° 04' 20" | Aw  | 24.5 | 1,162 |
| Santa Cruz do Escalvado (MG) | 20° 14' 09" | 42° 48' 50" | Aw  | 22.1 | 1,146 |
| Rio Doce (MG)                | 20° 14' 41" | 42° 53' 45" | Aw  | 22.2 | 1,143 |
| Ipatinga (MG)                | 19° 42' 23" | 42° 34' 33" | Aw  | 23.8 | 1,143 |
| São Francisco (MG)           | 15° 56' 55" | 45° 51' 52" | Aw  | 23.6 | 1,053 |
| Juazeiro (BA)                | 09° 24' 50" | 40° 30' 10" | BSh | 24.8 | 422   |
| Paulo Afonso (BA)            | 09° 24' 22" | 38° 12' 53" | BSh | 25.8 | 540   |
| Xingozinho (BA)              | 09° 32' 30" | 38° 01' 59" | BSh | 25.8 | 540   |

100 \*Classification according to [18]. <http://pt.climate-data.org/country/114/>

101 As and Aw (tropical savannah climate with dry winter season), with average temperature in any month of the  
102 year exceeding 18 °C. Winter is dry, with average rainfall less than 60 mm in at least one of the months of this  
103 season. BSh (hot semi-arid climate), with average temperature of the hottest month of the year 27.8 ° C. With a  
104 dry season during the year, with average rainfall in the driest month around 8 mm. Most of the rainfall occurs in  
105 March with an average of 83 mm.

106

107 Isolates of the collected samples were made and the fragments containing the fungal structures were  
108 grown in Petri plates containing Potato Carrot Agar (PCA) culture medium. The isolates were  
109 incubated at  $25 \pm 3$  °C in the dark for eight days [19]. The identification of organisms at the genus level  
110 was carried out using the identification key of Barnett and Hunter [20], by observations of the  
111 structures under a stereoscopic microscope. In order to confirm the pathogenicity of the isolates, they  
112 were inoculated in *T. dominguensis* disease free seedlings produced in a greenhouse, reproducing the  
113 symptoms verified in the field. For this, fungal suspensions ( $2.5 \times 10^6$  conidia / mL), plus Tween 80  
114 (0.05%) were used and the inoculation was done by brushing. The plants were then kept in a fog

115 chamber at 25 °C for 48 hours. After that time, they remained in the greenhouse for the evaluation,  
116 which was carried out daily, for 30 days.

### 117 **Concentrations of *Colletotrichum* sp. to evaluate the incidence and severity of the disease**

118 Due to the rapid sporulation in culture medium and the severity of the disease, which was assessed  
119 by fast evolution of the symptoms in the inoculated plant, only the cultures of the genus *Colletotrichum*  
120 sp. obtained in the detection test were used. To this end, the isolates were grown in potato dextrose agar  
121 (PDA) culture medium and incubated at  $25 \pm 1$  °C in the dark for eight days. The identification of the  
122 *Colletotrichum typhae* species was carried out under a stereoscopic microscope [21], being this the first  
123 report of the occurrence of this pathogen in aquatic macrophytes of this species and in *T. domingensis*  
124 in Brazil. The sample was subcultured three times to obtain a pure culture and stored at  $5 \pm 1$  °C after  
125 characterization of the species for further testing.

126 Four groups of adult and young plants of *T. domingensis*, arranged in three replicates, were used to  
127 evaluate the severity of the disease, with each replication consisting of a pot with three plants. The  
128 leaves were inoculated by brushing the conidial suspensions with 0.05% Tween 80 fixative, adjusted at  
129 four different concentrations (one for each group of plants):  $2.5 \times 10^4$ ,  $2.5 \times 10^5$ ,  $2.5 \times 10^6$  and  $2.5 \times 10^7$   
130 conidia / mL<sup>-1</sup>. The experiment was conducted in a humid chamber at  $25 \pm 1$  °C at 90% relative  
131 humidity and transferred to a greenhouse after 48 hours. The evaluations were carried out daily, during  
132 eight days. Since there is no descriptive or diagrammatic scale of the disease, the severity was  
133 evaluated by the percentage of leaf area affected by the symptoms, which was quantified from  
134 photocopied detached symptom leaves [22] using the software Severity.exe., where the injured area  
135 was calculated, thus it was possible to correlate the symptomatology and leaf morphology with  
136 damages caused by the anthracnose disease caused by *C. typhae*.

137

### 138 **Influence of temperature on mycelial growth and germination of *C. typhae* conidia**

139 For evaluation of mycelial growth, *C. typhae* mycelium discs (RWB99) from colonies with eight days  
140 of incubation in Vegetable Broth Agar (VBA) medium were placed in Petri plates, containing the same  
141 medium, one disc per plate, with five replicates with the experimental unit consisting of two Petri  
142 plates incubated at temperatures of 15, 20, 25, 30 and 35 °C in the dark. The evaluations were  
143 performed daily by measuring the diameter of the colonies in two perpendicular directions, during four  
144 days and from the averages obtained it was calculated the area below the mycelial growth curve.

145 To evaluate the conidia germination, a  $2.5 \times 10^6$  conidia / mL suspension of *C. typhae* was used. Four  
146 aliquots of 50 $\mu$ L were deposited at equidistant points in Petri plates containing agar-water medium  
147 scattered with a Drigalski loop. Five replicates were used, each containing two plates. The plates were  
148 incubated for eight days under the same conditions of the tests for evaluation of mycelial growth. After  
149 this time, aliquots of sterile distilled water were added to each plate. A fungal suspension was prepared  
150 by scraping the colonies and 100 spores of each plate were counted with the aid of a hemacytometer  
151 and an optical microscope, quantifying, in percentage, how many of these spores were germinated.

152

### 153 **Influence of temperature and leaf wetness period on *T. domingensis* infection by *C. typhae***

154 *T. domingensis* seedlings were prepared in polyethylene pots with a three liter capacity using coarse  
155 sand (3.0  $\mu$ m), organic substrate and Red Latosol (1:1:1; v/v) as substrate. Four groups of fifteen plants  
156 of different ages were inoculated with a suspension of  $2.5 \times 10^6$  spores / ml by atomization until run-off  
157 with P-600 compressor with the "PULVERJET" P-110 pistol. After inoculation the plants were kept in  
158 a humid chamber (wire-frame vessels wrapped with internally moistened plastic) within growth  
159 chambers with the following temperatures: 15, 20, 25 and  $30 \pm 2$  °C. Each group consisted of five  
160 subgroups of three plants, which were gradually removed from the wraps after 8, 12, 24 and 48 hours  
161 of leaf wetness. A subgroup for each treatment was placed in each growth chamber without being  
162 wrapped in plastic (corresponding to zero hour of leaf wetness). After completing 48 hours, all plants

163 were taken to the greenhouse to evaluate the incidence and severity of the disease. Six evaluations were  
164 performed at two-day intervals, with the first evaluation on the eighth day after inoculation.

165

### 166 ***C. typhae* host range**

167 In order to verify the host range of the isolate under study, inoculations were carried out on the species  
168 selected according to the phylogenetic centrifugal method [23], with modifications. Due to difficulties  
169 of obtaining other plants of the same genus and restrictions of the distribution of the Typhaceae family  
170 or even of the Typhales order, made it difficult to perform more complete analyzes for this pathogen.

171 Thus, *C. typhae* inoculation was performed in *T. domingensis* and plants of the same order and related  
172 orders of fruit, forest and large crop species (Anacardiaceae, Apiaceae, Araceae, Arecaceae,  
173 Asteraceae, Bromeliaceae, Cannaceae, Caricaceae, Chenopodiaceae, Commelinaceae, Cyperaceae,  
174 Euphorbiaceae, Euriocaulaceae, Fabaceae, Halaceae, Laceaceae, Malaceae, Mayaceae, Maraceaeae,  
175 Musaceae, Myraceceae, Poaceae, Pontederiaceae, Rosaceae, Rubiaceae, Rutaceae, Solanaceae,  
176 Sparganiaceae, Strelitzaceae, Typhaceae, Vitaceae, Xyridaceae and Zingiberaceae). Forest species and  
177 agricultural crops were included in the evaluation, whether or not related to the target plant, and plants  
178 of species susceptible to fungi of the genus *Colletotrichum* sp., totaling 53 species. Ten leaves of each  
179 plant species were inoculated by the  $2.5 \times 10^6$  conidia / mL<sup>-1</sup> suspension by the brushstroke method  
180 and were kept in a humid chamber at  $25 \pm 1$  °C with 90% relative humidity for 48 hours. After this  
181 time, they were transferred to a greenhouse and the evaluations to detect the presence or absence of  
182 symptoms caused by *C. typhae* were carried out at the 3rd, 7th and 21st days.

183

### 184 **Statistical analysis**

185 The tests performed to identify the effect of temperature on mycelial growth and germination of *C.*  
186 *typhae* spores were conducted in a randomized complete design with five replicates, with two Petri



187 plates each. To evaluate the influence of leaf wetness and temperature on *T. dominguensis* infection by  
188 *C. typhae*, the trials were conducted in a randomized complete design with 20 treatments and three  
189 replicates, each replicate consisting of a pot with three plants. The statistical editor used for the  
190 analyzes was SAEG.

191 The effect of the temperatures was evaluated by the analysis of variance and linear regression  
192 analysis. The equations were chosen based on the significance of the regression coefficients, adopting  
193 the level of 1% of probability. In the photoperiod effect test, the treatment means were compared by the  
194 Tukey test at a significance level of 5%.

195 In order to evaluate the effect of temperature and leaf wetness on the incidence and severity of the  
196 disease, a experiment was conducted in a complete randomized design, with four temperatures and five  
197 leaf wetness periods, treated in a factorial scheme with two factors (temperature and leaf wetness  
198 periods) and the data submitted to a linear regression analysis.

199

## 200 **Results and Discussion**

### 201 **Effect of different temperatures on *C. typhae* conidia germination**

202 The microflora associated with *T. dominguensis* plants was identified as *Colletotrichum typhae*  
203 (RWB-99, CBM-24, 26, 35, 94 and 97), *Cercospora* sp. (CBM-32, 97), *P. dichota* (CBM-14, 16, 24,  
204 26, 94, 97), *Phoma* sp. (CBM-05, 97), *C. typharum* (CBM-5, 13, 14, 16, 23, 32, 97, 24) and *Stenella*  
205 sp. (CBM-13), but only the *C. typhae* isolates were pathogenic to *T. dominguensis* at the concentration  
206 used in the pathogenicity test. For this reason, the other tests were carried out only with *C. typhae*, to  
207 verify their bioherbicidal capacity on *T. dominguensis*.

208 After analyzing the pathogenicity of the isolate at different inoculum concentrations, a development  
209 pattern of the anthracnose symptoms was observed at the concentration of  $2.5 \times 10^6$  spores / ml on the  
210 eighth day after inoculation, thus, the infection started with lesions slightly visible although

211 homogeneously distributed in the lap of the plants reaching a leaf area of 19%. In this study, levels  
212 from 0 to 100% of injured leaf area were identified, and the images obtained aided in the evaluation of  
213 the other trials.

214 The conidia produced by *Colletotrichum* sp. are survival structures. They are important in infection  
215 of the host and in the propagation of these pathogens. Despite its relevance to the fungal life cycle, the  
216 conidia biology has not been extensively investigated. In this study, the first description of the *C.*  
217 *typhae* conidia germination, whose ideal thermal condition was verified at a temperature of 20 °C, was  
218 observed, whereas the lowest spore production index was observed at the temperature of 35 °C (Fig.  
219 1A).

220 **Figure 1 – Effect of different temperatures, on *C. typhae* conidia germination in agar-water**  
221 **(A) and micelial growth in VBA (B).**

222 Similar results were obtained by Estrada et al. [24] who found that the optimal temperature for  
223 sporulation of *C. gloeosporioides* was between 20 and 25 °C. However, Poltronieri et al. [25] reported  
224 that the optimal temperature for conidia germination may vary for different species of the genus  
225 *Colletotrichum* sp., Harding and Raizada [11] observed that the germination of *Colletotrichum musae*  
226 B & MAC conidia is stimulated between 27 and 30 °C while Couto and Menezes [26], demonstrated  
227 that the *Colletotrichum coccodes* Wallr. sporulation occurs between 20 and 30 °C and for  
228 *Colletotrichum lagenarium* (Pass.) Ellis & Halst. at 16 °C.

229 The temperature data on the disease incidence were adjusted to the cubic regression model for  
230 mycelial growth and conidial germination variables. The conidia germination and the temperature  
231 range between 25 and 30 °C provided the highest *C. typhae* mycelial growth (Fig. 1A and 1B).

232 The inhibitory effect of temperature on fungi growth is variable, but most pathogens show better  
233 development at 20 to 25 °C. For *C. acutatum*, McKay et al. [27] reported that the optimum temperature  
234 for mycelial growth was 25 °C, and Harding and Raizada [11] stated that elevated temperatures around

235 35.5 °C paralyze *C. gloeosporioides* mycelial growth, corroborating with the results obtained in this  
236 study.

237 The relationship of a pathogen to the host may vary from one host to another and in this case, the  
238 interactions between this pathogenetic system are still not well understood [17]. Due to this interaction,  
239 studies on microorganisms for biological control of plants, aim to establish ideal culture conditions for  
240 mass and durable production of the inoculum in artificial culture [14]. Climate variables such as  
241 temperature, for example, influences the rate of fungal reproduction, physiological conditions of the  
242 host, growth and aggressiveness of pathogens. Thus, the knowledge of the interaction of the pathogen  
243 with environmental factors has a practical meaning, since the environment can alter its pathogenicity  
244 [28].

#### 245 **Effect of leaf wetness on the incidence of the disease and severity caused by *C. typhae***

246 The disease incidence data, when submitted to different temperatures and leaf wetness periods, were  
247 adjusted to the linear regression model, being a decreasing incidence in relation to the increase in  
248 temperature, and increasing in relation to the leaf wetness period (Fig 2 A and B). The temperature  
249 influenced the formation of chlorotic lesions on the leaf blade surface of *T. domingensis* plants, with  
250 the exception of 20% of the plants kept at temperatures of 15, 20 and 30 °C, which had no symptoms of  
251 anthracnose in the first evaluation that occurred eight days after inoculation. It was also found that at  
252 temperatures of 15 and 20 °C, the maximum incidence of the disease was 95 and 90%, respectively  
253 (Fig 2A). On the other hand, during the evaluations of leaf wetness periods, it was observed that after  
254 the period of 48 hours, in addition to the influence of the temperature, the duration of the leaf wetness  
255 period favored the incidence of *C. typhae* with maximum percentage rate of 95% of symptomatic plants  
256 (Fig 2B).

257

258 **Figure 2 – Effect of leaf wetness on the incidence of the disease caused by *C. typhae* em plants of**  
259 ***T. domingensis*, in the greenhouse.**

260

261 With regards to the severity of the disease, it was observed that at zero hour of leaf wetness, small  
262 lesions near the lap of the plants were contacted, whereas in the higher parts of the plants these lesions  
263 were very scarce (Fig 3). Lima et al. [29] evaluating the development of phytopathogens, reported the  
264 absence of disease in zero wetness, indicating that the incidence of the fungus *Puccinia kuehnii* may be  
265 related to the need of free water on the leaves of the inoculated plants and a wetness period for at least  
266 12 hours for fungal infection to occur. However, by the results obtained in this study, probably the  
267 presence of anthracnose symptoms in the lap of *T. domingensis* plants at zero wetness period with a  
268 rate of 85% is due to the proximity of these areas to the water in the pot, where it was possible to create  
269 a microclimate that has favored conidial germination, infection and lesion development.

270

271 **Figure 3 – Effect of leaf wetness on the severity of the disease caused by *C. typhae* in plants of *T.***  
272 ***domingensis*, in the greenhouse.**

273

274 Spores of most pathogenic fungi require free water for hours at the host surface for germination and  
275 consequent penetration. The increase in disease intensity accompanies the wetness period up to a  
276 certain threshold, from which the maximum amount of disease is reached and it is no longer influenced  
277 by additional wetness periods [30]. According to Lima et al. [29], from a certain concentration of  
278 infection points, lesions that form first, may hinder the development of others that result from  
279 subsequent infections. However, in the present study the highest progression of both disease incidence  
280 and severity was detected with increasing leaf wetness time duration (Figs 2B and 3).

281 The highest severity of symptoms detected was observed in 8, 24 and 48 hours leaf wetness periods,  
282 with rates of 82, 85 and 88%, respectively. There is little research on the epidemiology of anthracnose  
283 caused by *C. typhae*; in addition, the results obtained in this study are the first report of this disease in  
284 *T. domingensis* plants, so further studies are probably needed to confirm these results (Fig 3).

285 Climate variables such as temperature and precipitation influence the development of anthracnose  
286 symptoms. Under high temperature conditions, pathogens can grow rapidly and severe outbreaks of  
287 disease are expected in environments with high relative humidity [31]. According to Soares-Colletti  
288 and Lourenço [32], the infection rate is high in the range of 15 to 30 °C for *C. gloeosporioides*, with the  
289 ideal temperature around 25 °C, however, for *C. acutatum* as for *C. typhae* a maximum incidence of  
290 this pathogen occurred at 20 °C. Regarding the wetness period, the results obtained in this study with  
291 *C. typhae* coincide with those found by Soares, Lourenço and Amorim [33], who reported that the  
292 greater severity of anthracnose caused by *C. acutatum* and *C. gloeosporioides* was high after 48 hours.

293 From the results obtained in this study during the evaluation of the incidence and severity of  
294 anthracnose in plants of *T. domingensis*, it was verified that the amount of hours of the wetness period  
295 needs to be continuous reaching its peak after 48 hours. In order to cause infection in plants, *C. typhae*  
296 probably requires several short wetness rather than a single long period. Among the factors that have  
297 most restricted the good performance of potential mycoherbicides is the need for a long duration of the  
298 leaf wetness period for the infection to occur [34]. However, these restrictions can be overcome by  
299 methods of artificial inoculation, since the moisture level and inoculation during the leaf wetness  
300 period can be increased by the more efficient use of wetness agents or emulsions, or by applying the  
301 fungus to gel or by using granular preparations [35,36].

302 Most of the studied potential plant mycoherbicides have been based on formulations of fungi  
303 species. The biological control that is involved in the application of fungal spores propagation in  
304 concentrations that do not occur in nature, is the most used strategy in the use of mycoherbicides based

305 on these pathogens [37]. Several studies indicate that fungi of the genus *Colletotrichum* receive  
306 attention as potential mycoherbicides, since they have enzymes that degrade the plant cell walls,  
307 suggesting that some of these proteins may have specific roles in plant infection. There is also evidence  
308 that both species of *Colletotrichum* have the ability to produce indole-acetic acid, whose derivatives are  
309 well-established models of herbicides [38].

310 However, anthracnose caused by species of the genus *Colletotrichum* is a common and destructive  
311 disease in diverse agricultural crops and forest species. Its global occurrence causes significant losses  
312 in tropical and subtropical regions [39]. Although the genus contains species with different lifestyles,  
313 plants can be infected during any stage of development and symptoms appear after colonization of  
314 fungi, which is characterized by necrotic lesions in leaves [40]. Therefore, due to the lack of  
315 information about its occurrence and aggressiveness, there is a need to determine the susceptibility of  
316 plant species to validate the prospection of mycoherbicides, adopting the pathogenicity test proposed  
317 by Wapshere [23], widely used in biological control programs.

#### 318 **Pathogenicity of the *Colletotrichum* hyphae isolate inoculated at room temperature**

319 In this study, the host range was evaluated using 53 plants, among species and / or varieties included  
320 in the test, and only *T. domingensis* was susceptible to *C. typhae*, suggesting high specificity for the  
321 analyzed isolate (Table 2). The *C. typhae* isolate obtained in the survey produced symptoms similar to  
322 those obtained in the collection areas, with lesions on the leaves, both in the adaxial and abaxial parts,  
323 punctiform, yellow with chlorotic halo, becoming necrotic to the center with a light brown color. Based  
324 on these results, it can be inferred that this pathogen has effects mainly on the aerial part of *T.*  
325 *domingensis*, therefore, it is necessary to carry out more studies mainly at the molecular level, in order  
326 to confirm its mycoherbicide potential. It should be considered that a mycoherbicide may not  
327 necessarily have the same effect on plants as a chemical herbicide. However, these compounds have  
328 the potential to provide a competitive advantage for seedling growth through infection and growth

329 retardation of weed seedlings. Therefore, isolation and structural characterization and mode of action of  
330 phytotoxins produced by pathogenic fungi for weeds, including aquatic invasive plants, should be  
331 investigated [41].

332 **Table 2. Pathogenicity of the ecogenicidade Colletotrichum hyphae isolate inoculated at room**  
333 **temperature in humid chamber. Viçosa, MG, Brazil, 2018.**

| Family         | Species/Variety                             | Result* |
|----------------|---------------------------------------------|---------|
| Anacardiaceae  | <i>Mangifera indica</i> L./ Ubá             | -       |
| Apiaceae       | <i>Daucus carota</i> L./Brasília            | -       |
| Araceae        | <i>Pistia stratiotes</i> L.                 | -       |
| Arecaceae      | <i>Cocus nucifera</i> L./ Anã               | -       |
| Asteraceae     | <i>Helianthus annuus</i> L. /UFV-10         | -       |
| Bromeliaceae   | <i>Ananas comosus</i> (L.) Merr./ Pérola    | -       |
| Cannaceae      | <i>Cana denudata</i> Rosc.                  | -       |
| Caricaceae     | <i>Carica papaya</i> L. /Formosa            | -       |
| Chenopodiaceae | <i>Beta vulgaris</i> L./Wonder              | -       |
| Commelinaceae  | <i>Commelina bengalensis</i> L.             | -       |
|                | <i>Tradescantia zebrina</i> Hort. ex Bosse. | -       |
|                | <i>Tradescantia pallida</i> (Rose) Hunt.    | -       |
|                | <i>Callisia repens</i> (Jacq) L.            | -       |
|                | <i>Commelina erecta</i> L.                  | -       |
| Cyperaceae     | <i>Cyperus esculentus</i> L.                | -       |
|                | <i>Cyperus rotundus</i> L.                  | -       |

|                |                                               |   |
|----------------|-----------------------------------------------|---|
| Euphorbiaceae  | <i>Manihot esculenta</i> Crantz.              | - |
|                | <i>Hevea brasiliensis</i> Willd.              | - |
| Euriocaulaceae | <i>Paepalanthus</i> sp.                       | - |
| Halorrhagaceae | <i>Myriophyllum aquaticum</i> (Vell.) Verdc   | - |
| Fabaceae       | <i>Glycine max</i> L. / UFV-16                | - |
|                | <i>Phaseolus vulgares</i> L.                  | - |
|                | <i>Rachis hypogaea</i> L. / IAC-Jimbo         | - |
| Juncaceae      | <i>Eleocharis filiculmis</i> Kunth.           | - |
| Lauraceae      | <i>Persea americana</i> Mill. / Wagner        | - |
| Liliaceae      | <i>Allium cepa</i> L. / Monte Alegre          | - |
| Malvaceae      | <i>Gossypium hirsutum</i> L. / IAPAR 4PR.1    | - |
|                | <i>Gossypium hirsutum</i> L. / IAC - 22       | - |
| Mayacaceae     | <i>Mayaca</i> sp.                             | - |
| Marantaceae    | <i>Marantha</i> sp.                           | - |
| Moraceae       | <i>Ficus carica</i> L. / Roxo de Valinhos     | - |
| Musaceae       | <i>Musa</i> sp./Prata                         | - |
| Myrtaceae      | <i>Psidium guajava</i> L. / Campos            | - |
| Poaceae        | <i>Oryza sativa</i> L. / BR IRGA 409          | - |
|                | <i>Oryza sativa</i> L. / CICA-8               | - |
|                | <i>Echinochloa polystachya</i> (H.B.K.) Hitch | - |
|                | <i>Saccharum</i> sp. / Cana Caiana            | - |



|                |                                                  |   |
|----------------|--------------------------------------------------|---|
|                | <i>Zea mays</i> L.                               | - |
|                | <i>Sorghum bicolor</i> (L.) Moench/ BR - 700     | - |
| Pontederiaceae | <i>Eichhornia azurea</i> (Swartz) Kunth          | - |
|                | <i>Eichhornia crassipes</i> (Mart.) Solms        | - |
| Rosaceae       | <i>Prunus</i> sp / REDHAVEN                      | - |
| Rubiaceae      | <i>Coffea arabica</i> L. / CATUAI - 2144         | - |
| Rutaceae       | <i>Citrus</i> sp. / Taiti                        | - |
| Solanaceae     | <i>Nicotiana tabacum</i> L. / XALTHI             | - |
|                | <i>Lycopersicon sculentum</i> Mill. /Santa Clara | - |
|                | <i>Capsicum annuum</i> L. / Casca Dura           | - |
| Sparganiaceae  | <i>Sparganicum</i> sp.                           | - |
| Strelitzaceae  | <i>Strelitzia reginae</i> Banks                  | - |
| Typhaceae      | <i>Typha domingensis</i> Pers.                   | + |
| Vitaceae       | <i>Vitis</i> sp. /Niagara Rosada                 | - |
| Xyridaceae     | <i>Xyris</i> sp                                  | - |
| Zingiberaceae  | <i>Zingiber officinale</i> Rosc.                 | - |

---

334 \* (+) presence of symptoms and signs of the pathogen, (-) absence of symptomatology.

335

336 Rangel-Peraza et al. [2] considered submerged aquatic plants as the most problematic, since they  
337 drastically reduce water flow, are rapid in invasion of new areas and difficult to manage or control. The  
338 perennial growth habit and the formation of monophytic colonies seem to make them the ideal target of

339 chemical control. However, the use of chemical herbicides is often compromised by problems related  
340 to the aquatic environment, including dilution and contact time in tap water.

341

### 342 **Conclusions**

343 The growth of the *C. typhae* colonies in artificial medium is higher when they are submitted to  
344 temperatures of 25 to 30 °C, whereas, for spore germination, there was no photoperiod interference, but  
345 the highest percentage of germination occurred at 17.39 °C. The influence of environmental conditions  
346 on the infection in artificially inoculated leaves of *T. domingensis* indicated that the temperature of 15  
347 °C and 48 hours of leaf wetness promoted the highest disease incidence, as well as the severity for the  
348 same period of leaf wetness. The specificity test showed that *C. typhae* is very specific since it was  
349 pathogenic only to *T. domingensis*. Being this the first report of the occurrence of this pathogen in  
350 aquatic macrophytes of this species and in *T. domingensis* in Brazil.

### 351 **Acknowledgements**

352 The authors acknowledge the Fundação de Amparo à Pesquisa e ao Desenvolvimento Científico e  
353 Tecnológico do Maranhão - FAPEMA.

### 354 **Author Contributions**

355 **Conceptualization:** Cláudio Belmino Maia, Robert Weingart Barreto, Luiz Antônio Maffia

356 **Data curation:** Cláudio Belmino Maia, Paulo Alexandre Fernandes Rodrigues de Melo, Kedma Maria  
357 Silva Pinto, Ilka Márcia Ribeiro de Souza Serra, Mário Luiz Ribeiro Mesquita, Aline Priscilla Gomes  
358 da Silva.

359 **Funding acquisition:** Luiz Antônio Maffia

360 **Investigation:** Cláudio Belmino Maia, Paulo Alexandre Fernandes Rodrigues de Melo, Robert  
361 Weingart Barreto

362 **Methodology:** Cláudio Belmino Maia

363 **Supervision:** Robert Weingart Barreto, Luiz Antônio Maffia

364 **Validation:** Cláudio Belmino Maia

365 **Visualization:** Cláudio Belmino Maia, Paulo Alexandre Fernandes Rodrigues de Melo, Ilka Márcia  
366 Ribeiro de Souza Serra, Janaina Marques Mondego.

367 **Writing – original draft:** Cláudio Belmino Maia, Paulo Alexandre Fernandes Rodrigues de Melo,  
368 Kedma Maria Silva Pinto

369 **Writing – review & editing:** Cláudio Belmino Maia, Paulo Alexandre Fernandes Rodrigues de Melo,  
370 Robert Weingart Barreto, Luiz Antônio Maffia, Kedma Maria Silva, Antonia Alice Costa Rodrigues,  
371 Ilka Márcia Ribeiro de Souza Serra, Mário Luiz Ribeiro Mesquita, Janaina Marques Mondego, Aline  
372 Priscilla Gomes da Silva

### 373 **References**

- 374 1. Oliveira JPV, Pereira MP, Duarte VP, Corrêa FF, Castro EM, Pereira FJ. Cadmium tolerance of  
375 *Typha domingensis* Pers. (*Typhaceae*) as related to growth and leaf morphophysiology. Braz J  
376 Biol. 2018;77(1):52-9. <https://dx.doi.org/10.1590/1519-6984.171961>.
- 377 2. Rangel-Peraza JG, Mendivil-García K, Cedillo-Herrera CIG, Rochín-Medina JJ, Rodríguez-  
378 Mata A E, Bustos-Terrones YA. Optimization of organic matter degradation kinetics and  
379 nutrient removal on artificial wetlands using *Eichhornia crassipes* and *Typha domingensis*.  
380 *Enviro Technol.* 2017;15(2):1-9. <https://doi.org/10.1080/09593330.2017.1400111>

- 381       **3.** Bonanno G, Cirelli GL. Comparative analysis of element concentrations and translocation in  
382       three wetland congener plants: *Typha domingensis*, *Typha latifolia* and *Typha angustifolia*.  
383       Ecoto and Enviro Saf. 2017;143(5): 92-101. <https://doi.org/10.1016/j.ecoenv.2017.05.021>
- 384       **4.** Lagerwall G, Kiker G, Muñoz-Carpena R, Wang N. Accounting for the impact of  
385       management scenarios on *Typha Domingensis* (Cattail) in an everglades wetland. Enviro  
386       Manage. 2017;59(1):129-40. <https://doi.org/10.1007/s00267-016-0769-0>
- 387       **5.** Smith SM, Newman S. Growth of southern cattail (*Typha domingensis* Pers.) seedlings in  
388       response to fire-related soil transformations in the Northern Florida everglades. Wetlands.  
389       2001;21(3):363-9.
- 390       **6.** Pompêo M. Monitoramento e manejo de macrófitas aquáticas em reservatórios tropicais  
391       brasileiros. Instituto de Bio- ciências da USP. 2017;138.  
392       <https://doi.org/10.11606/9788585658670>. Portuguese.
- 393       **7.** Malaspina IC, Cruz C, Garlich N, Bianco S, Pitelli RA. Effectiveness of diquat, both isolated  
394       and associated with copper sources in controlling the *Hydrilla verticillata* submerged  
395       macrophytes and *ankistrodesmus gracilis* microphyte. Planta Daninha. 2017;35(3):1-8.  
396       <https://dx.doi.org/10.1590/s0100-83582017350100018>.
- 397       **8.** Pitelli RLCM, Toffanelli C, Vieira E, Pitelli RA, Velini ED. Dinâmica da comunidade de  
398       macrófitas aquáticas no reservatório de Santana, RJ. Planta Daninha. 2008;26(3):473-480.  
399       Portuguese.
- 400       **9.** Diao YZ, Fan JR, Wang ZW, Liu XL. First Report of *Colletotrichum boninense* causing  
401       anthracnose on pepper in China. Plant Dis. 2013;97(1):138-148. <https://doi.org/10.1094/PDIS->  
402       04-12-0403-PDN

- 403       **10.** Garlich N, Cruz C, Silva A, Carraschi SP, Malaspina IC, Pitelli RA, et al. Diquat associated  
404               with copper sources for algae control: efficacy and ecotoxicology. *J Environ Sci Health B.*  
405               2016;1(4):1-7. <https://doi.org/10.1080/03601234.2015.1120611>
- 406       **11.** Harding DP, Raizada MN. Controlling weeds with fungi, bacteria and viruses: a review. *Front*  
407               *Plant Sci.* 2015;6(3):1-14. <https://doi.org/10.3389/fpls.2015.00659>
- 408       **12.** Heydari A, Pessarakli M. A review on biological control of fungal plant pathogens using  
409               microbial antagonists. *J Biol Sci.* 2010;10(4):273-90.  
410               <https://doi.org/10.3923/jbs.2010.273.290>
- 411       **13.** Singh B, Saxena S, Meshram V, Kumar M. Mycoherbicidal potential of *Phaeoacremonium*  
412               *italicum*, a new pathogen of *Eichhornia crassipes* infesting harike wetland, India. *Mycobiol.*  
413               2016;44(2):85-2. <https://doi.org/10.5941/MYCO.2016.44.2.85>
- 414       **14.** Jiménez MM, Villasana AM. Evaluation of toxicity of *Cercospora piaropi* in a mycoherbicide  
415               formulation by using bacterial bioluminescence and the Ames mutagenicity tests.  
416               *Mycopathologia.* 2009;167(4):203-8. <https://doi.org/10.1007/s11046-008-9161-9>
- 417       **15.** Cimmino A, Masi M, Evidente M, Superchi S, Evidente A. Fungal phytotoxins with potential  
418               herbicidal activity: chemical and biological characterization. *Nat Prod Reports.*  
419               2015;32(12):1629-53. <https://doi.org/10.1039/C5NP00081E>
- 420       **16.** Kusari S, Hertweck C, Spiteller M. Chemical ecology of endophytic fungi: origins of secondary  
421               metabolites. *Chem Biol.* 2012;19(7):792-8. <https://doi.org/10.1016/j.chembiol.2012.06.004>
- 422       **17.** Doyle VP, Oudemans PV, Rehner SA, Litt A. Habitat and host indicate lineage identity in  
423               *Colletotrichum gloeosporioides* s.l. from Wild and agricultural landscapes in North America.  
424               *PLoS One.* 2013;8(5): e62394. <https://doi.org/10.1371/journal.pone.0062394>
- 425       **18.** Köppen W, Geinger R. *Klimate der erde.* Gotha: verlag justus perthes. Wall-map.1928.

- 426       **19.** Villa-Rivera MG, Conejo-Saucedo U, Lara-Marquez A, Cano-Camacho H, Lopez-Romero E,  
427           Zavala-Paramo MG. The Role of Virulence Factors in the Pathogenicity of *Colletotrichum* sp.  
428           Curr Protein Pept Sci. 2017;18(10):1005-18.  
429           <https://doi.org/10.2174/1389203717666160813160727>
- 430       **20.** Barnett HC, Hunter BB. Illustrated genera of imperfect fungi. 3th ed. Burgess:  
431           Mineapolis;1972.
- 432       **21.** Greene, HC. Notes on Wisconsin parasitic fungi. XXII. Transactions of the Wisconsin  
433           Academy of Science and Arts, Letters. 1956;44(41): 29-43.
- 434       **22.** Horsfall JG, Barratt RW. An improved grading system for measuring plant diseases.  
435           Phytopathol. 1945;35(5): 655.
- 436       **23.** Wapshere AJA. Strategy for evaluating the safety of organisms for biological weed control.  
437           Ann Apl Biol. 1974;77(5):201-11. <https://doi.org/10.1111/j.1744-7348.1974.tb06886.x>
- 438       **24.** Estrada AB, Dodd JC, Jeffries P. Effect of humidity and temperature on conidial germination  
439           and appressorium development of two Philippine isolates of the mango anthracnose pathogen  
440           *Colletotrichum gloeosporioides*. Plant Pathol. 2000;49(5):608-18.  
441           <https://doi.org/10.1046/j.1365-3059.2000.00492.x>
- 442       **25.** Poltronieri TPS, Azevedo LAS, Silva DEM. Efeito da temperatura no crescimento micelial,  
443           produção e germinação de conídios de *Colletotrichum gloeosporioides*, isolados de frutos de  
444           palmeira Juçara (*Euterpe edulis* Mart). Summa Phytopathol. 2013;39(4):281-285. Portuguese.
- 445       **26.** Couto EF, Menezes M. Physiological and morphological characterization of *Colletotrichum*  
446           *musae* isolates. Fitopatol Bras. 2004;29(4):406-12. [https://dx.doi.org/10.1590/S0100-](https://dx.doi.org/10.1590/S0100-41582004000400008)  
447           41582004000400008
- 448       **27.** Mckay SF, Freeman S, Minz D, Maymon M, Sedgley M, Collins GC, Scott ES. Morphological,  
449           genetic, and pathogenic characterization of *Colletotrichum acutatum*, the cause of anthracnose

- 450 of almond in Australia. *Phytopathol.* 2009;99(8):985-95. <https://doi.org/10.1094/PHYTO-99-8->  
451 0985
- 452 **28.** Terefe H, Fininsa C, Sahile S, Tesfaye K. Effect of temperature on growth and sporulation of  
453 *Botrytis fabae*, and resistance reactions of faba bean against the pathogen. *J Plant Pathol*  
454 *Microbiol.* 2015;6(7): 1-9. <https://doi.org/10.4172/2157-7471.1000285>
- 455 **29.** Lima LL, Scaloppi EAG, Barreto LF, Barreto M. Temperatures and leaf wetness duration on  
456 orange rust development in sugarcane (*Puccinia kuehni*). *Summa Phytopathol.* 2017;43(2):132-  
457 5. <https://dx.doi.org/10.1590/0100-5405/1890>
- 458 **30.** Bedendo IP, Amorim L. Ambiente e doença. In: Amorim L, Rezende JAM, Bergamin Filho, A.  
459 *Manual de Fitopatologia: Princípios e conceitos.* Ceres: São Paulo; 2011. p. 133-47.
- 460 **31.** Moral J, Jurado-Bello J, Sánchez, M I, Oliveira R, Trapero A. Effect of temperature, wetness  
461 duration, and planting density on olive anthracnose caused by *Colletotrichum* spp. *Phytopathol.*  
462 2012;102(10):974-81. <https://doi.org/10.1094/PHYTO-12-11-0343>
- 463 **32.** Soares-Colletti AR, Lourenço SA. Effect of temperature, wetness duration and cultivar on the  
464 development of anthracnose in guava fruits. *Summa phytopathol.* 2014;40(4):307-312.  
465 <http://dx.doi.org/10.1590/0100-5405/1988>
- 466 **33.** Soares AR, Lourenço SA, Amorim L. Infecção de goiabas por *Colletotrichum gloeosporioides*  
467 e *Colletotrichum acutatum* sob diferentes temperaturas e períodos de molhamento. *Trop Plant*  
468 *Pathol.* 2008;33(4):265-72. <http://dx.doi.org/10.1590/S1982-56762008000400002>. Portuguese.
- 469 **34.** Boyetchko SM, Roskopf EN, Caesar AJ, Charudattand R. Biological weed control with  
470 pathogens: search for candidates to applications. *Appl l Mycol and Biotechnol.* 2002;2(3): 239-  
471 74. [https://doi.org/10.1016/S1874-5334\(02\)80013-2](https://doi.org/10.1016/S1874-5334(02)80013-2)
- 472 **35.** Walker HL, Connick WJ. Sodium alginate for production and formulation of mycoherbicides.  
473 *Weed Sci.* 1983;31(4):333-8. <https://doi.org/10.1017/S0043174500069113>

- 474 **36.** Walker HL. Granular formulation of *Alternaria macrospora* for control of spurred anoda  
475 (*Anoda cristata*). Weed Sci. 1981;29(3):342-5.
- 476 **37.** Brun T, Rabuske JE, Todero I, Almeida TC, Dias Junior JJ, Ariotti G, et al. Production of  
477 bioherbicide by *Phoma* sp. in a stirred-tank bioreactor. 3 Biotech. 2016;6(2):1-9.  
478 <https://doi.org/10.1007/s13205-016-0557-9>
- 479 **38.** Wei W, Ying X, Wenjun Z, Nancong W, Guogen Y, Fang P. *Colletotrichum higginsianum*  
480 mitogen-activated protein kinase chmk1: role in growth, cell wall integrity, colony  
481 melanization, and pathogenicity. Front Microbiol. 2016;7(3):1212-20.  
482 <https://doi.org/10.3389/fmicb.2016.01212>
- 483 **39.** Araújo NAF, Vieira JDM, Moura MR, Pessoa WRLS, Barguil BM. Pathogenicity and  
484 aggressiveness of *Colletotrichum gloeosporioides* isolates in ornamental pepper. Pesq. Agropec.  
485 Tropical. 2016;46(3): 321-326. <http://dx.doi.org/10.1590/1983-40632016v4641483>
- 486 **40.** Villa-Rivera MG, Conejo-Saucedo U, Lara-Marquez A, Cano-Camacho H, Lopez-Romero E,  
487 Zavala-Paramo MG. The Role of Virulence Factors in the Pathogenicity of *Colletotrichum* sp.  
488 Curr Protein Pept Sci. 2017;18(10):1005-18.  
489 <https://doi.org/10.2174/1389203717666160813160727>
- 490 **41.** Souza ARC, Baldoni DB, Lima J, Porto V, Marcuz C, Machado C, Ferraz RC, et al. Selection,  
491 isolation, and identification of fungi for bioherbicide production. Braz J Microbiol.  
492 2017;48(1):101-8. <https://dx.doi.org/10.1016/j.bjm.2016.09.004>



**Fig 1. Effect of different temperatures, on *C. typhae* conidia germination in (A) agar-water and (B) micelial growth in VBA.**

bioRxiv preprint doi: <https://doi.org/10.1101/502526>; this version posted December 20, 2018. The copyright holder for this preprint (which was not certified by peer review) is the author/funder, who has granted bioRxiv a license to display the preprint in perpetuity. It is made available under aCC-BY 4.0 International license.

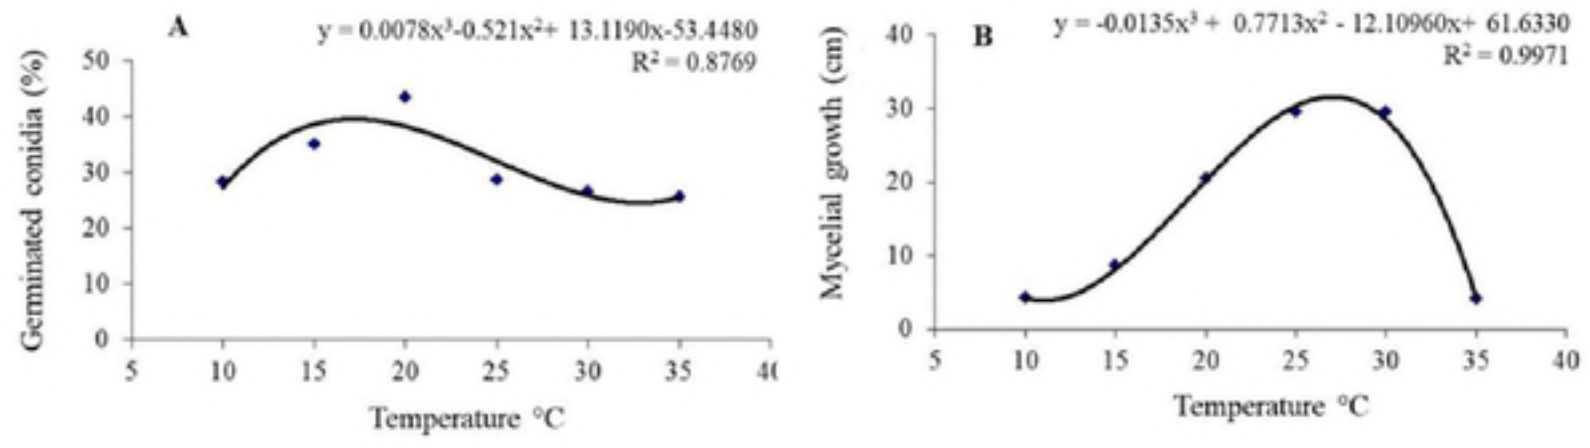

Figure 1 – Effect of different temperatures, on *C. typhae* conidia germination in agar-water (A) and micelial growth in VBA (B).

bioRxiv preprint doi: <https://doi.org/10.1101/502526>; this version posted December 20, 2018. The copyright holder for this preprint (which was not certified by peer review) is the author/funder, who has granted bioRxiv a license to display the preprint in perpetuity. It is made available under aCC-BY 4.0 International license.

**Fig 2. Effect of leaf wetness on the incidence of the disease caused by *C. typhae* em plants of *T. domingensis*, in the greenhouse.**

bioRxiv preprint doi: <https://doi.org/10.1101/502526>; this version posted December 20, 2018. The copyright holder for this preprint (which was not certified by peer review) is the author/funder, who has granted bioRxiv a license to display the preprint in perpetuity. It is made available under aCC-BY 4.0 International license.

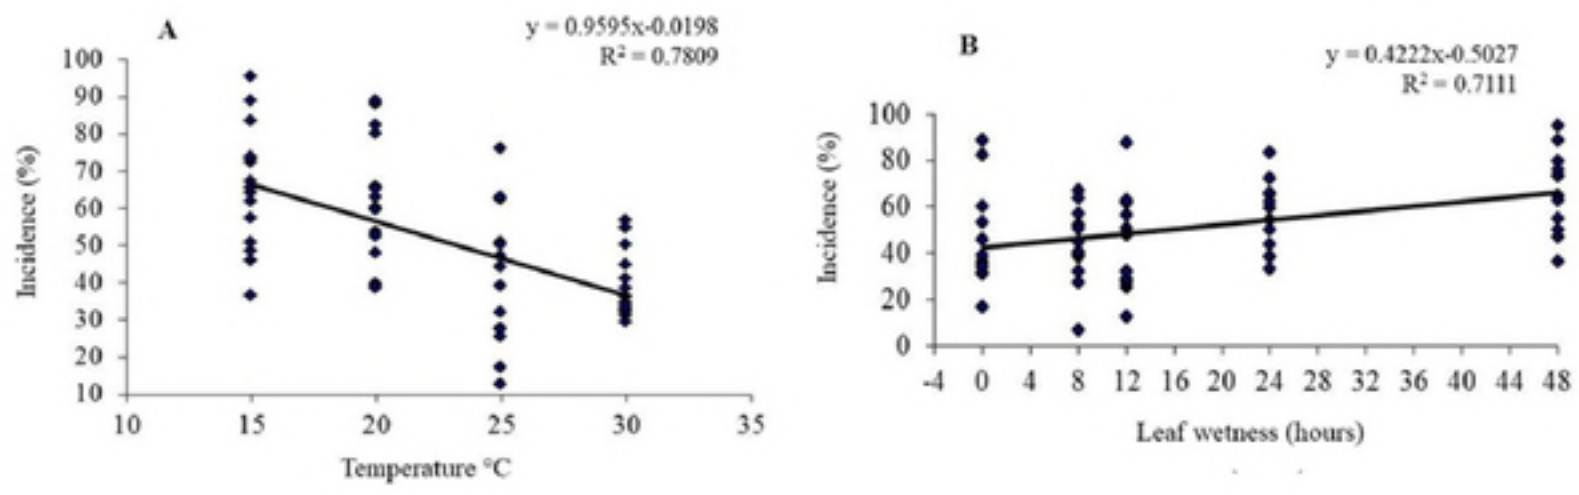

Figure 2 – Effect of leaf wetness on the incidence of the disease caused by *C. typhae* on plants of *T. domingensis*, in the greenhouse.

bioRxiv preprint doi: <https://doi.org/10.1101/502526>; this version posted December 20, 2018. The copyright holder for this preprint (which was not certified by peer review) is the author/funder, who has granted bioRxiv a license to display the preprint in perpetuity. It is made available under aCC-BY 4.0 International license.

**Fig 3. Effect of leaf wetness on the severity of the disease caused by *C. typhae* in plants of *T. domingensis*, in the greenhouse.**

bioRxiv preprint doi: <https://doi.org/10.1101/502526>; this version posted December 20, 2018. The copyright holder for this preprint (which was not certified by peer review) is the author/funder, who has granted bioRxiv a license to display the preprint in perpetuity. It is made available under aCC-BY 4.0 International license.

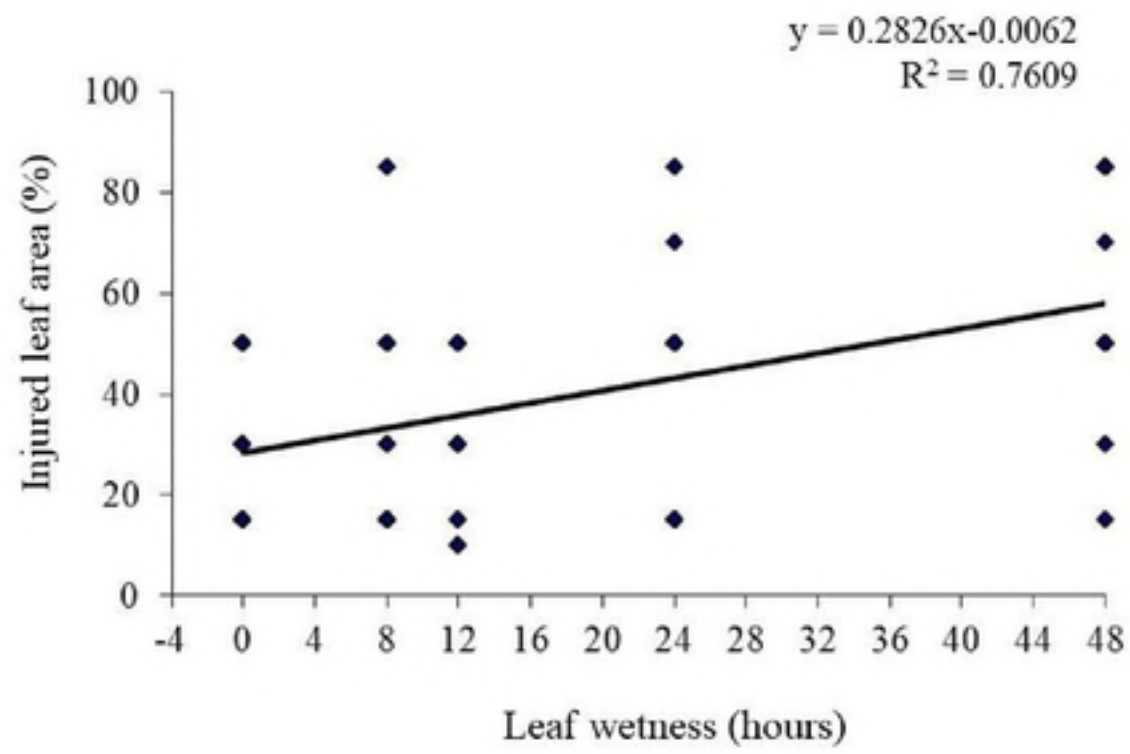

Figure 3 – Effect of leaf wetness on the severity of the disease caused by *C. typhae* in

plants of *T. americana* in the greenhouse

bioRxiv preprint doi: <https://doi.org/10.1101/092599>; this version posted December 20, 2016. The copyright holder for this preprint (which was not certified by peer review) is the author/funder, who has granted bioRxiv a license to display the preprint in perpetuity. It is made available under aCC-BY 4.0 International license.
